# Supplementary material
Source: PubMed Central journal article supplement (PMC3857702)

**Supplementary Table 1: Characteristics and relationship of clinical features to FGFR expression (n=47).**

| Variable                                       | n  | FGFR3  |                |      | FGFR4  |               |      |
|------------------------------------------------|----|--------|----------------|------|--------|---------------|------|
|                                                |    | Median | (Range)        | P*   | Median | (Range)       | P*   |
| <b>TOTAL</b>                                   | 47 | 110.70 | (35.66-211.83) |      | 11.07  | (1.22-67.76)  |      |
| <b>Age at diagnosis</b>                        |    |        |                | 0.76 |        |               | 0.61 |
| > 35 years                                     | 20 | 108.86 | (35.66-211.83) |      | 8.66   | (1.22-67.76)  |      |
| ≤ 35 years                                     | 27 | 110.78 | (43.49-163.82) |      | 12.72  | (1.95-54.88)  |      |
| <b>Sex</b>                                     |    |        |                | 0.90 |        |               | 0.48 |
| Male                                           | 20 | 110.78 | (35.66-211.83) |      | 12.72  | (1.22-67.76)  |      |
| Female                                         | 27 | 110.19 | (41.27-167.50) |      | 7.06   | (1.95-54.88)  |      |
| <b>Body Mass Index</b>                         |    |        |                | 0.41 |        |               | 0.96 |
| Normal (< 25)                                  | 13 | 132.47 | (69.56-185.80) |      | 15.13  | (3.06-67.76)  |      |
| Overweight (25-29.9)                           | 19 | 110.78 | (43.49-156.84) |      | 12.72  | (1.95-54.88)  |      |
| Obese (≥ 30)                                   | 4  | 101.22 | (88.13-137.60) |      | 9.83   | (6.27-43.48)  |      |
| Unknown                                        | 11 | 103.53 | (35.66-211.83) |      | 8.42   | (1.22-20.61)  |      |
| <b>Year of Diagnosis</b>                       |    |        |                | 0.38 |        |               | 0.08 |
| 1980-1989                                      | 3  | 109.69 | (69.56-133.88) |      | 5.91   | (3.06-7.88)   |      |
| 1990-1999                                      | 18 | 85.87  | (43.49-185.80) |      | 10.78  | (1.22-42.67)  |      |
| 2000-2009                                      | 26 | 113.83 | (35.66-211.83) |      | 14.10  | (4.00-67.76)  |      |
| <b>Site</b>                                    |    |        |                | 0.13 |        |               | 0.55 |
| Trunk                                          | 7  | 133.88 | (70.77-156.84) |      | 15.45  | (6.53-54.88)  |      |
| Upper Extremity                                | 6  | 125.50 | (88.13-211.83) |      | 9.71   | (4.00-17.38)  |      |
| Lower Extremity                                | 34 | 102.55 | (35.66-185.80) |      | 10.78  | (1.22-67.76)  |      |
| <b>Tumor size, 5 cm cut pt</b>                 |    |        |                | 0.75 |        |               | 0.37 |
| ≤ 5 cm                                         | 14 | 106.44 | (35.66-211.83) |      | 9.20   | (1.22-33.28)  |      |
| > 5 cm                                         | 31 | 110.78 | (43.49-185.80) |      | 12.72  | (1.95-67.76)  |      |
| Unknown                                        | 2  | 94.38  | (41.27-147.49) |      | 18.03  | (15.45-20.61) |      |
| <b>Tumor size, 7 cm cut pt</b>                 |    |        |                | 0.84 |        |               | 0.64 |
| ≤ 7 cm                                         | 23 | 110.70 | (35.66-211.83) |      | 9.98   | (1.22-53.29)  |      |
| > 7 cm                                         | 22 | 109.40 | (43.49-185.80) |      | 13.07  | (1.95-67.76)  |      |
| Unknown                                        | 2  | 94.38  | (41.27-147.49) |      | 18.03  | (15.45-20.61) |      |
| <b>Histologic Subtype</b>                      |    |        |                | 0.22 |        |               | 0.33 |
| Monophasic                                     | 27 | 110.78 | (43.49-221.83) |      | 11.07  | (1.22-67.76)  |      |
| Biphasic                                       | 20 | 105.63 | (35.66-185.80) |      | 11.49  | (3.06-54.88)  |      |
| <b>Pre-treated w/Chemotherapy or Radiation</b> |    |        |                | 0.84 |        |               | 0.32 |
| Yes                                            | 13 | 109.69 | (48.54-185.80) |      | 7.88   | (1.22-54.88)  |      |
| No                                             | 34 | 110.74 | (35.66-211.83) |      | 12.89  | (1.95-67.76)  |      |
| <b>Radiation</b>                               |    |        |                | 0.88 |        |               | 0.70 |
| Yes                                            | 30 | 110.98 | (35.66-182.41) |      | 9.44   | (1.22-54.88)  |      |
| No                                             | 15 | 110.70 | (41.27-211.83) |      | 13.07  | (3.06-67.76)  |      |
| Unknown                                        | 2  | 104.31 | (67.70-140.91) |      | 15.94  | (15.13-16.74) |      |
| <b>Chemotherapy</b>                            |    |        |                | 0.18 |        |               | 0.16 |
| Yes                                            | 24 | 123.02 | (48.54-211.83) |      | 14.07  | (1.22-67.76)  |      |
| No                                             | 23 | 109.36 | (35.66-175.95) |      | 9.98   | (1.95-42.67)  |      |
| <b>Metastatic disease at diagnosis</b>         |    |        |                | 0.37 |        |               | 0.88 |
| Yes                                            | 3  | 135.68 | (77.85-185.80) |      | 11.07  | (6.53-30.73)  |      |
| No                                             | 44 | 110.19 | (35.66-211.83) |      | 11.49  | (1.22-67.76)  |      |

\*Wilcoxon or Kruskal-Wallis tests as necessary

**Supplementary Figure 1: Progression-Free Survival for SS Patients Diagnosed from 1980-2010. [A]** by gender and **[B]** by BMI at or near time of diagnosis: normal versus overweight/obese, excluding unknown and patients less than 18 years of age (n=80).

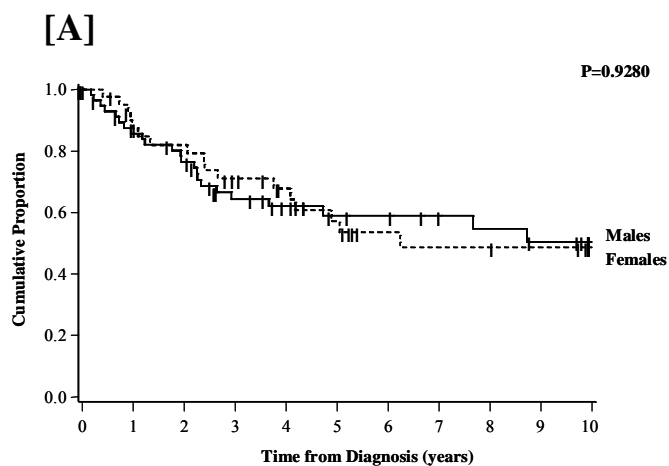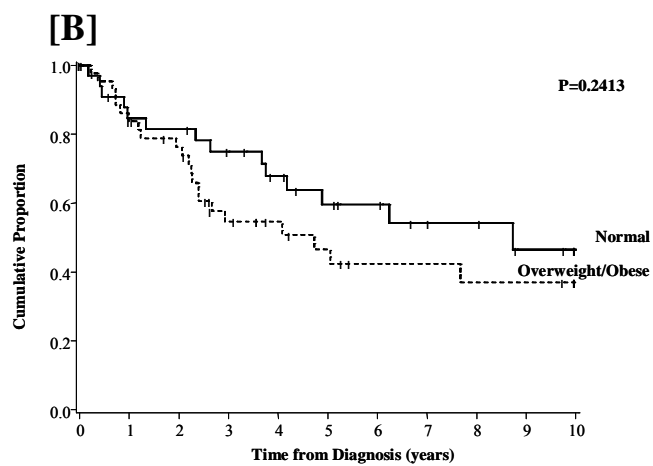

Supplement: NIHMS483221-supplement-1.pdf [file NIHMS483221-supplement-1.pdf]
